# Supplementary material
Source: publisher figshare collection journal article supplement (https://tandf.figshare.com/articles/dataset/_/8275202)
Supplement: Supplementary file 1 [file 2]

Archive with 8 entries (8 files):
- taje_a_1586771_sm8489.pdf
- taje_a_1586771_sm7115.pdf
- taje_a_1586771_sm7112.pdf
- taje_a_1586771_sm7107.pdf
- taje_a_1586771_sm7102.pdf
- taje_a_1586771_sm7091.pdf
- taje_a_1586771_sm7090.pdf
- taje_a_1586771_sm7004.pdf
