# Supplementary material
Source: publisher figshare collection journal article supplement (https://tandf.figshare.com/articles/dataset/_/8275202)

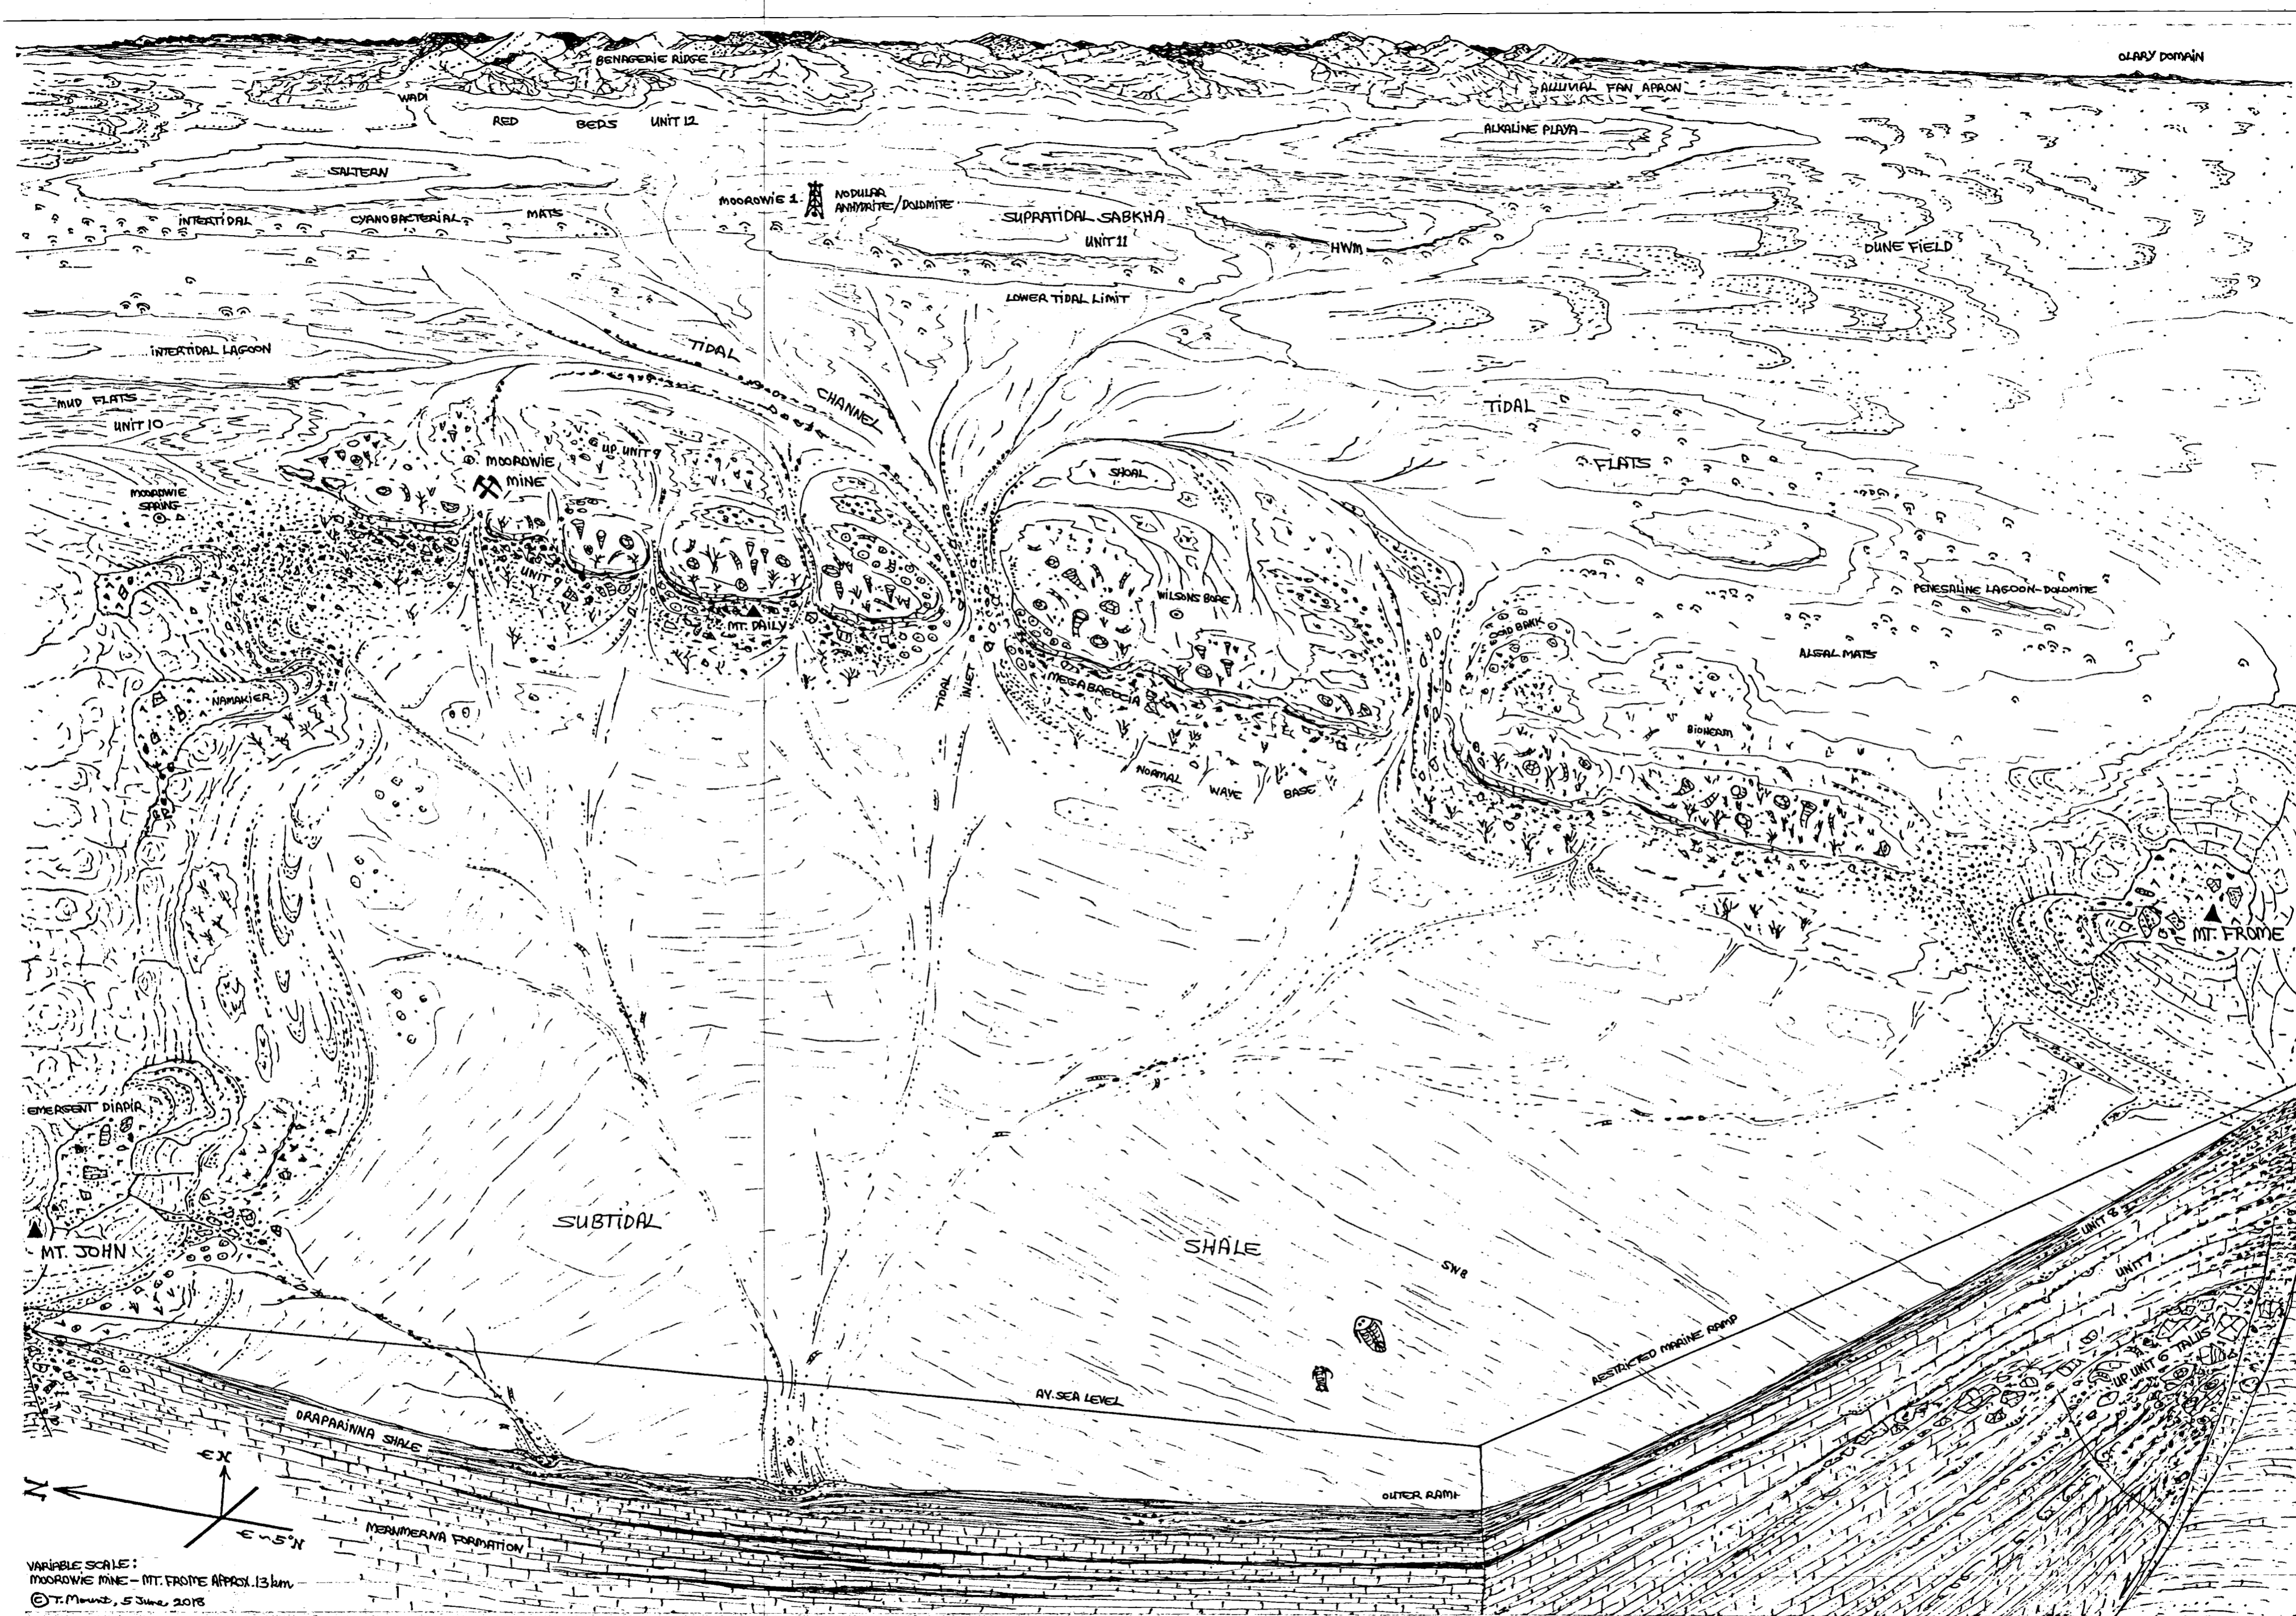

Supplement: Supplementary file 1 [file 2 › taje_a_1586771_sm8489.pdf]

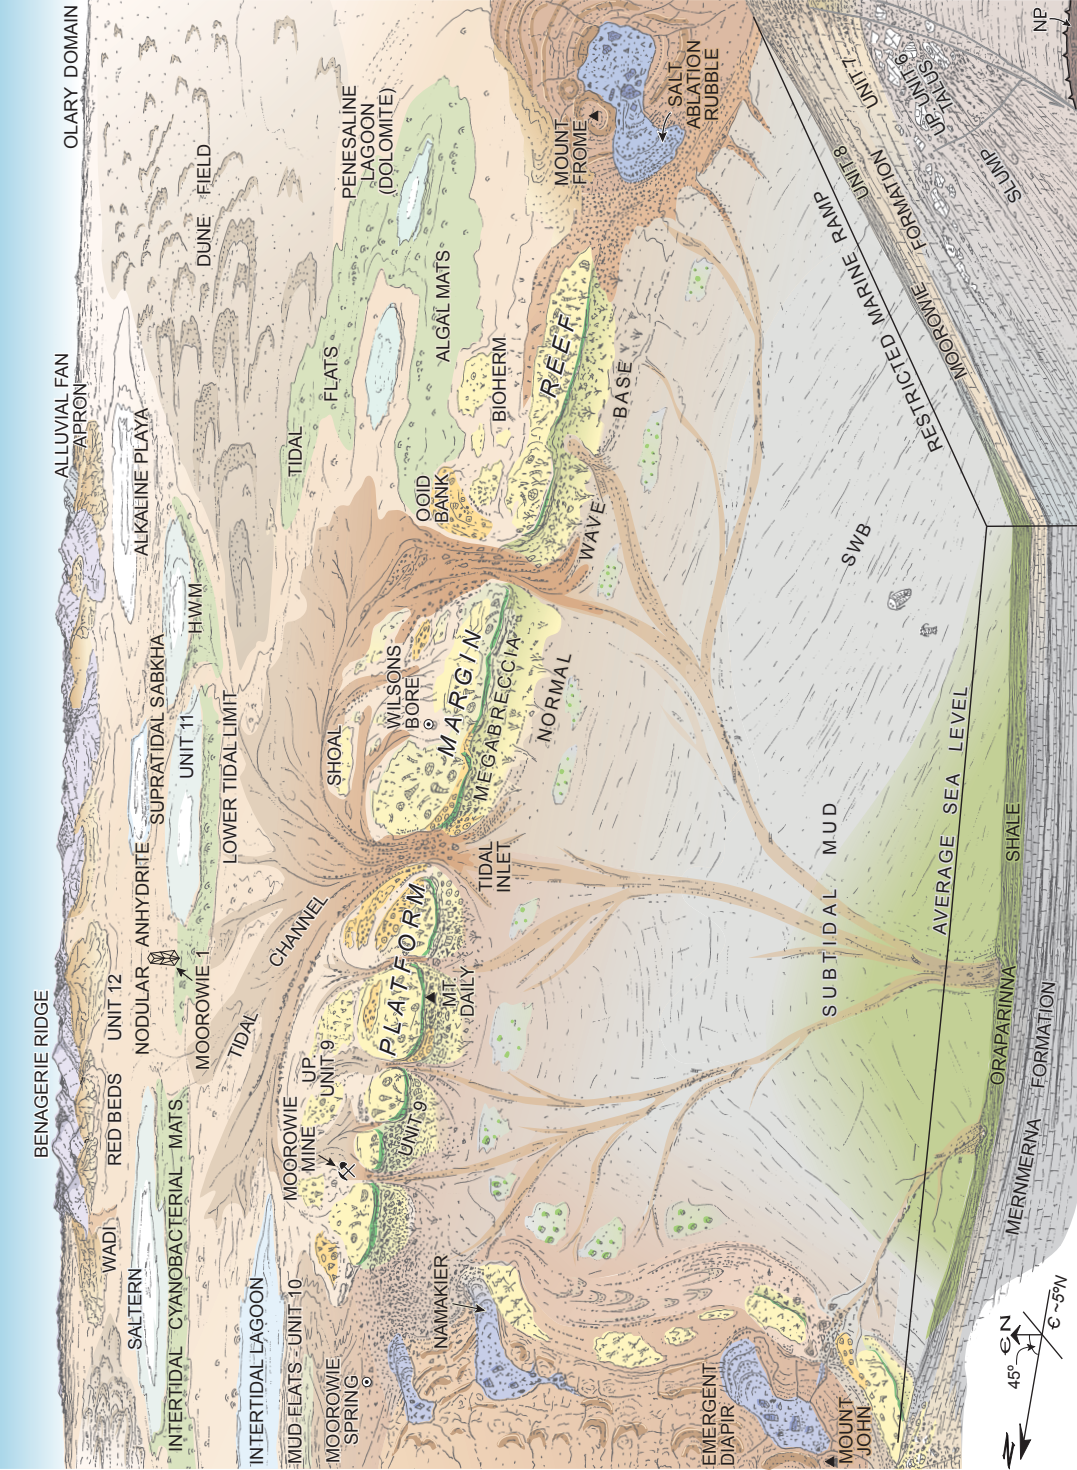

Variable Scale: Moorowarie Mine - Mt Frome = approx. 13km © T Mount, 5 June 2018

Supplement: Supplementary file 1 [file 2 › taje_a_1586771_sm7115.pdf]

T J Mount, June 1970

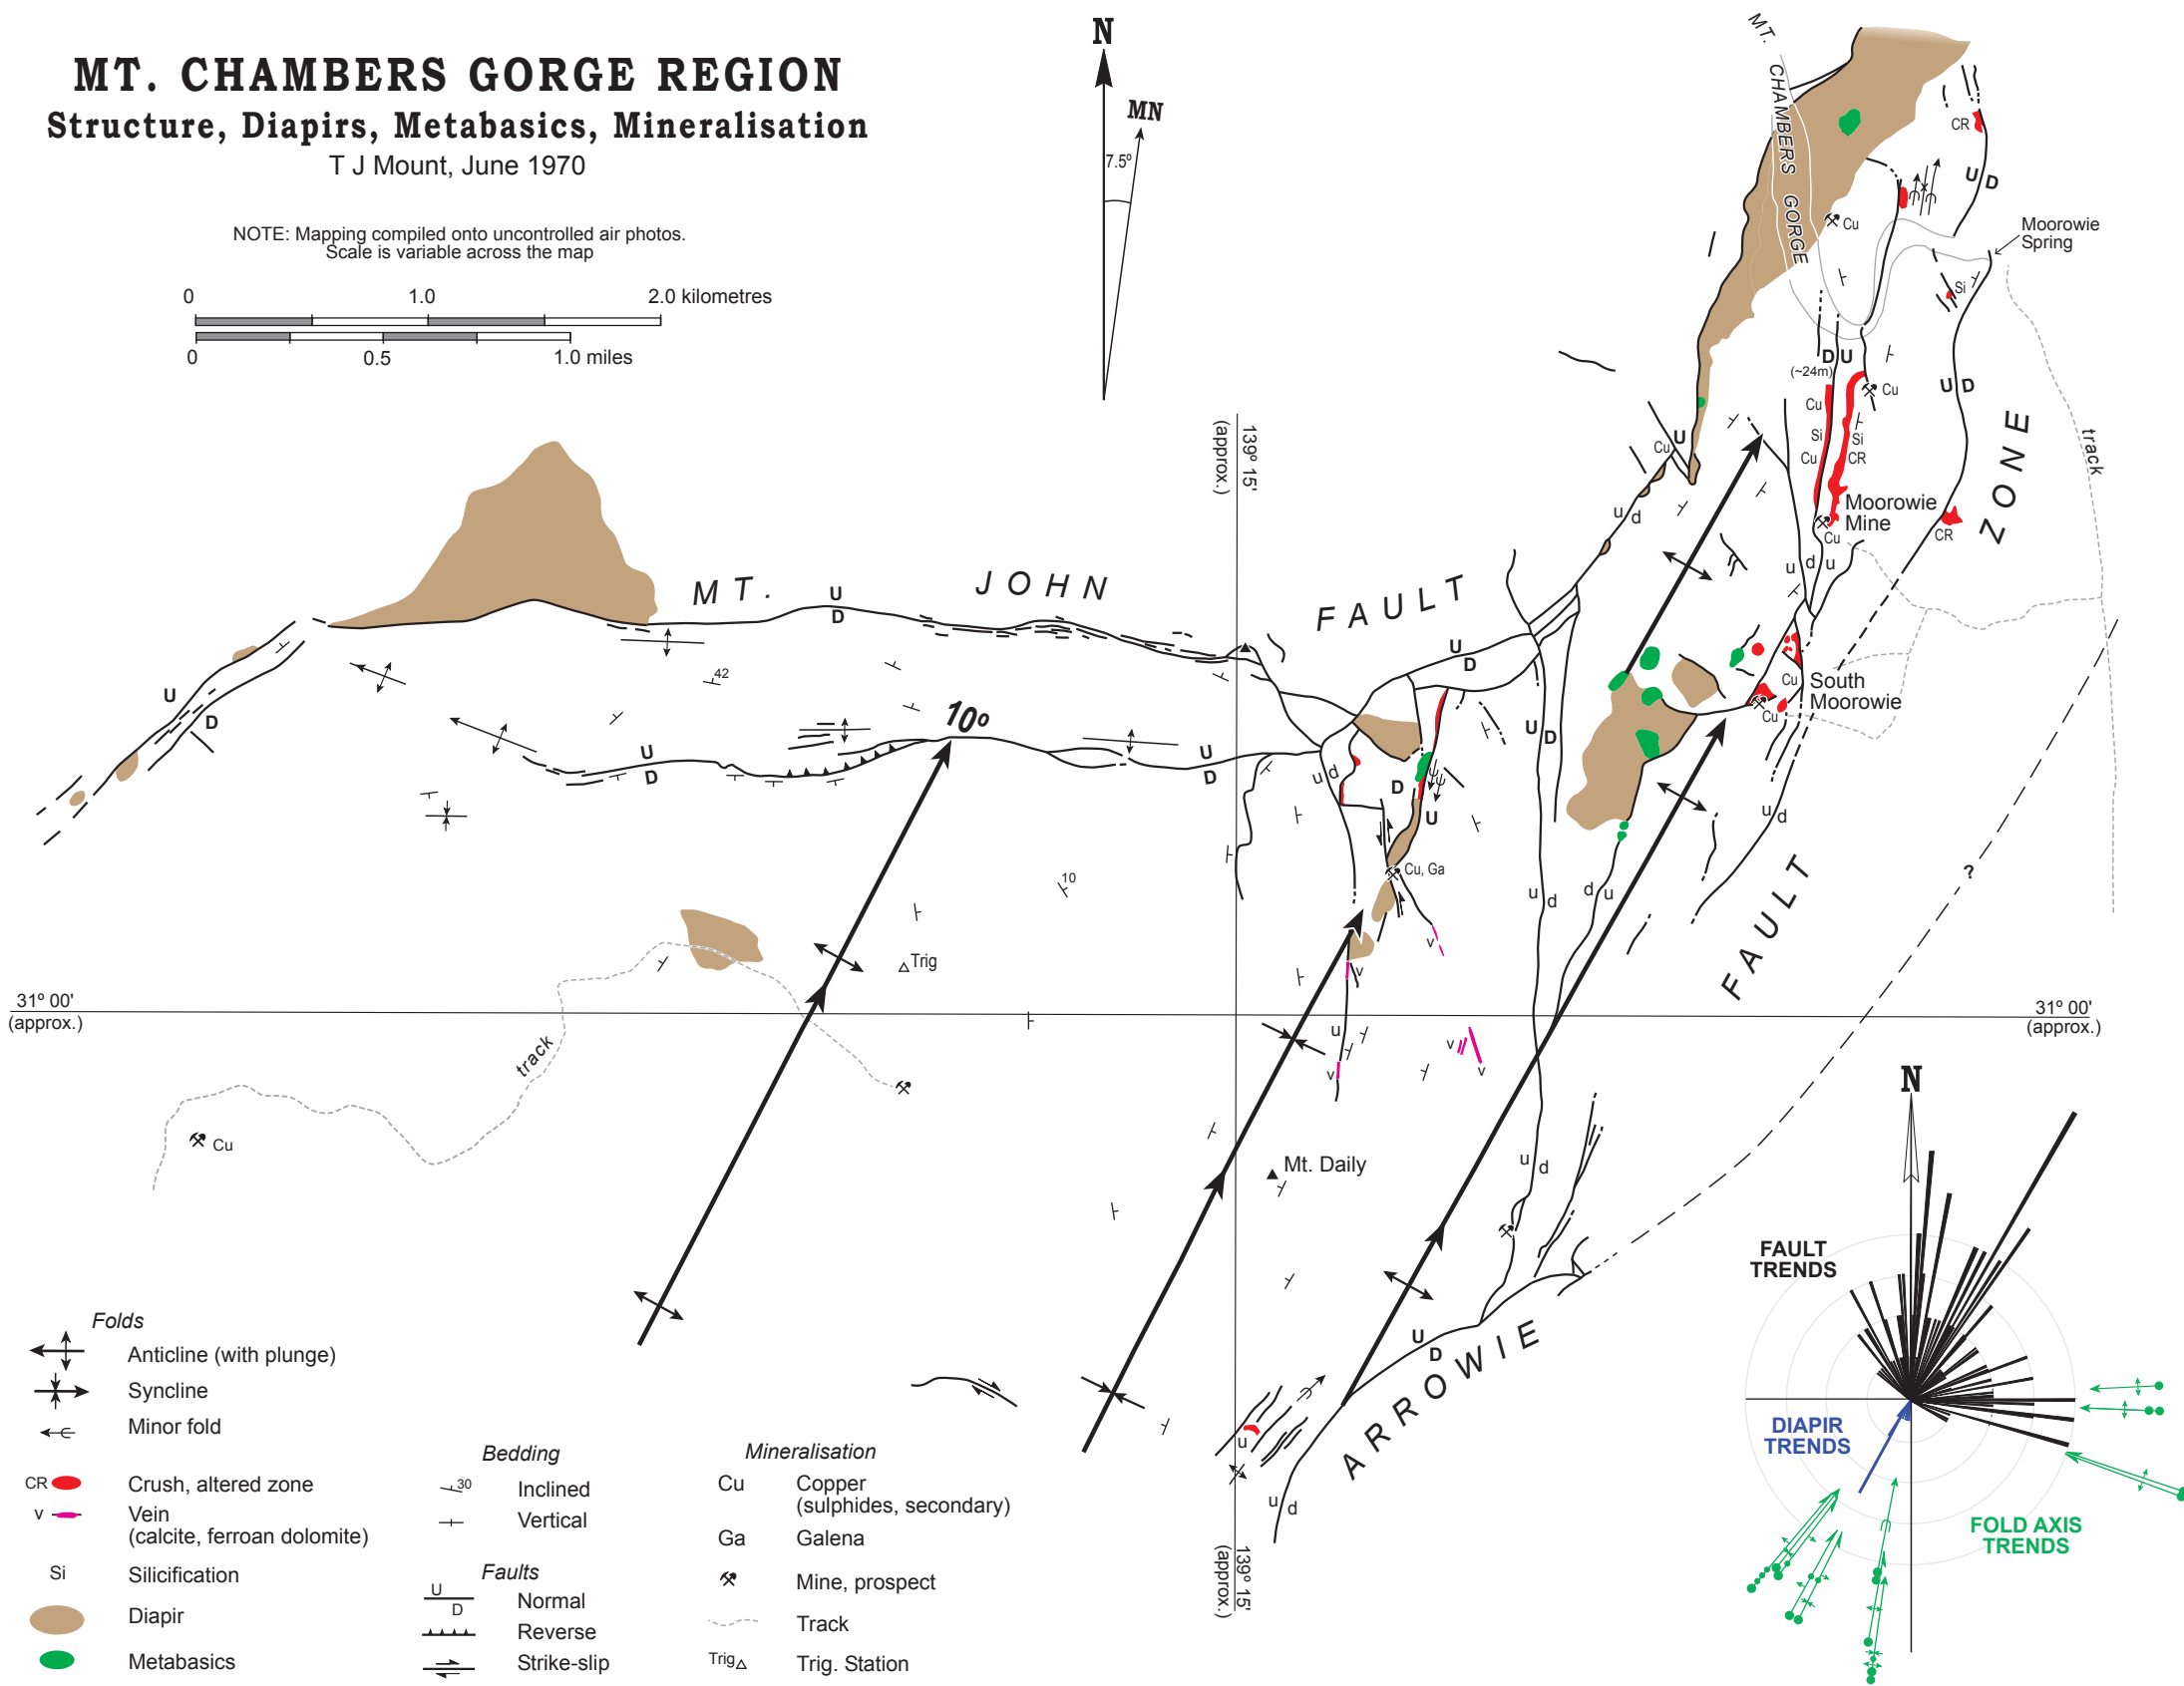

Supplement: Supplementary file 1 [file 2 › taje_a_1586771_sm7112.pdf]

Cambrian, Mt. Chambers Gorge  
Stratigraphic Sections A - Z  
T. J. Mount, 1970

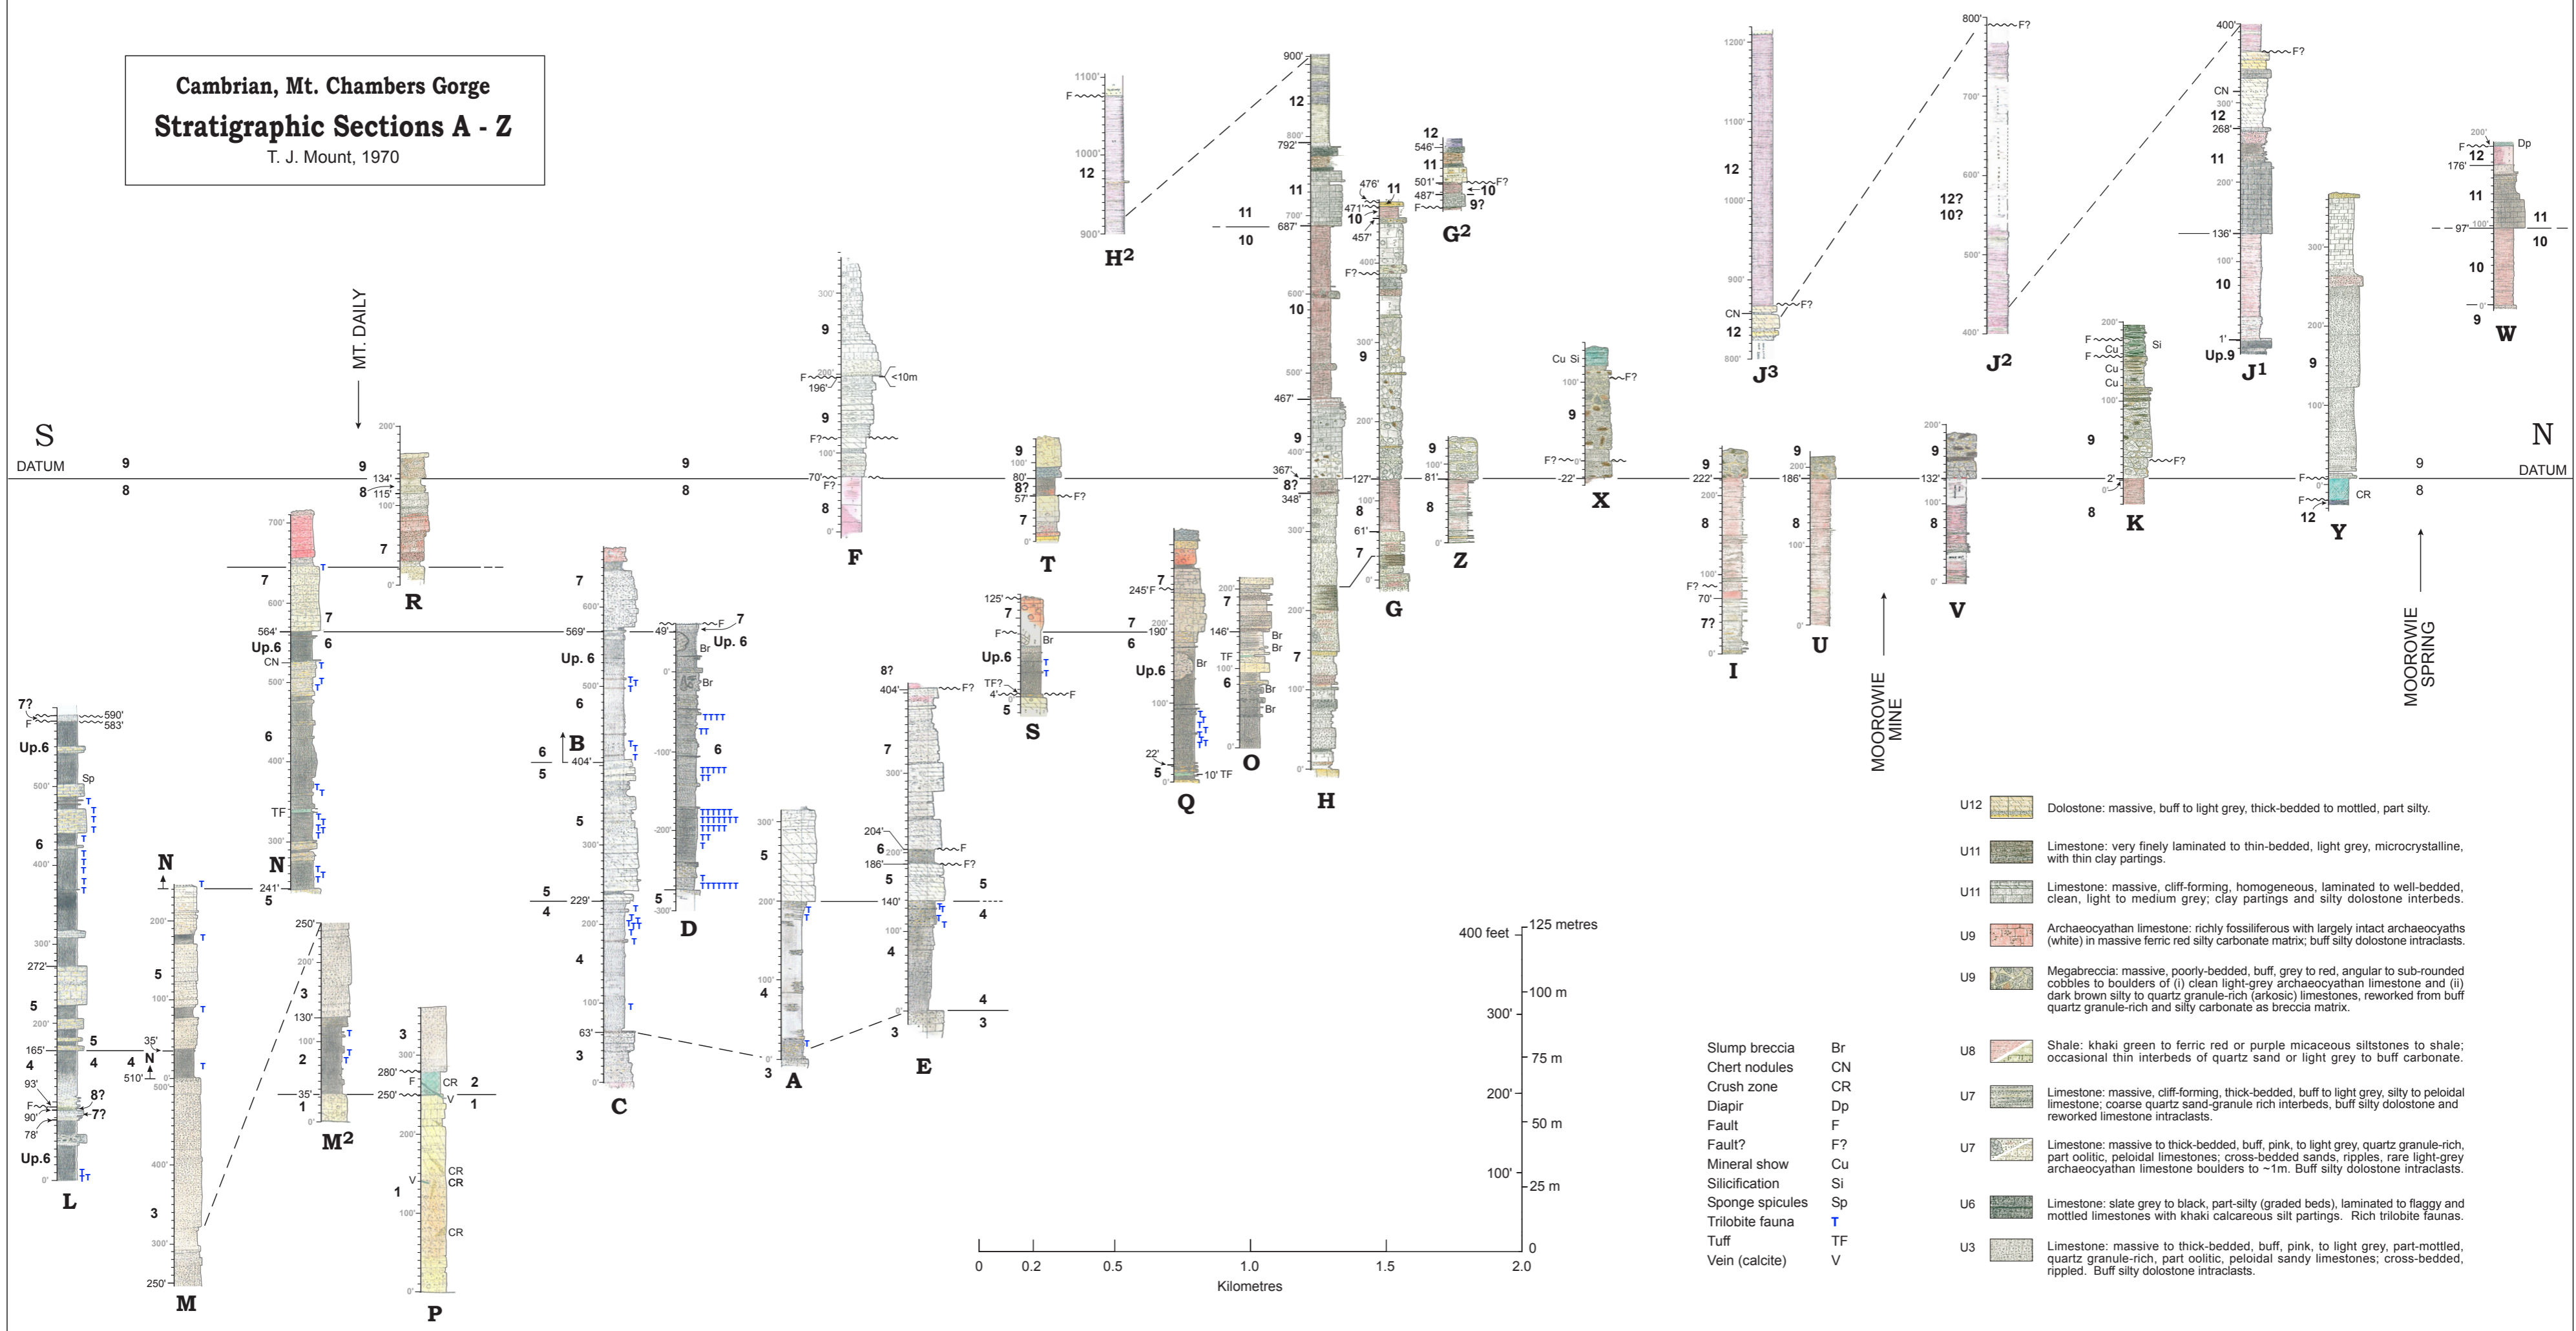

Supplement: Supplementary file 1 [file 2 › taje_a_1586771_sm7107.pdf]

# Cambrian, Mt. Chambers Gorge Stratigraphic Sections A - Z

T. J. Mount, 1970

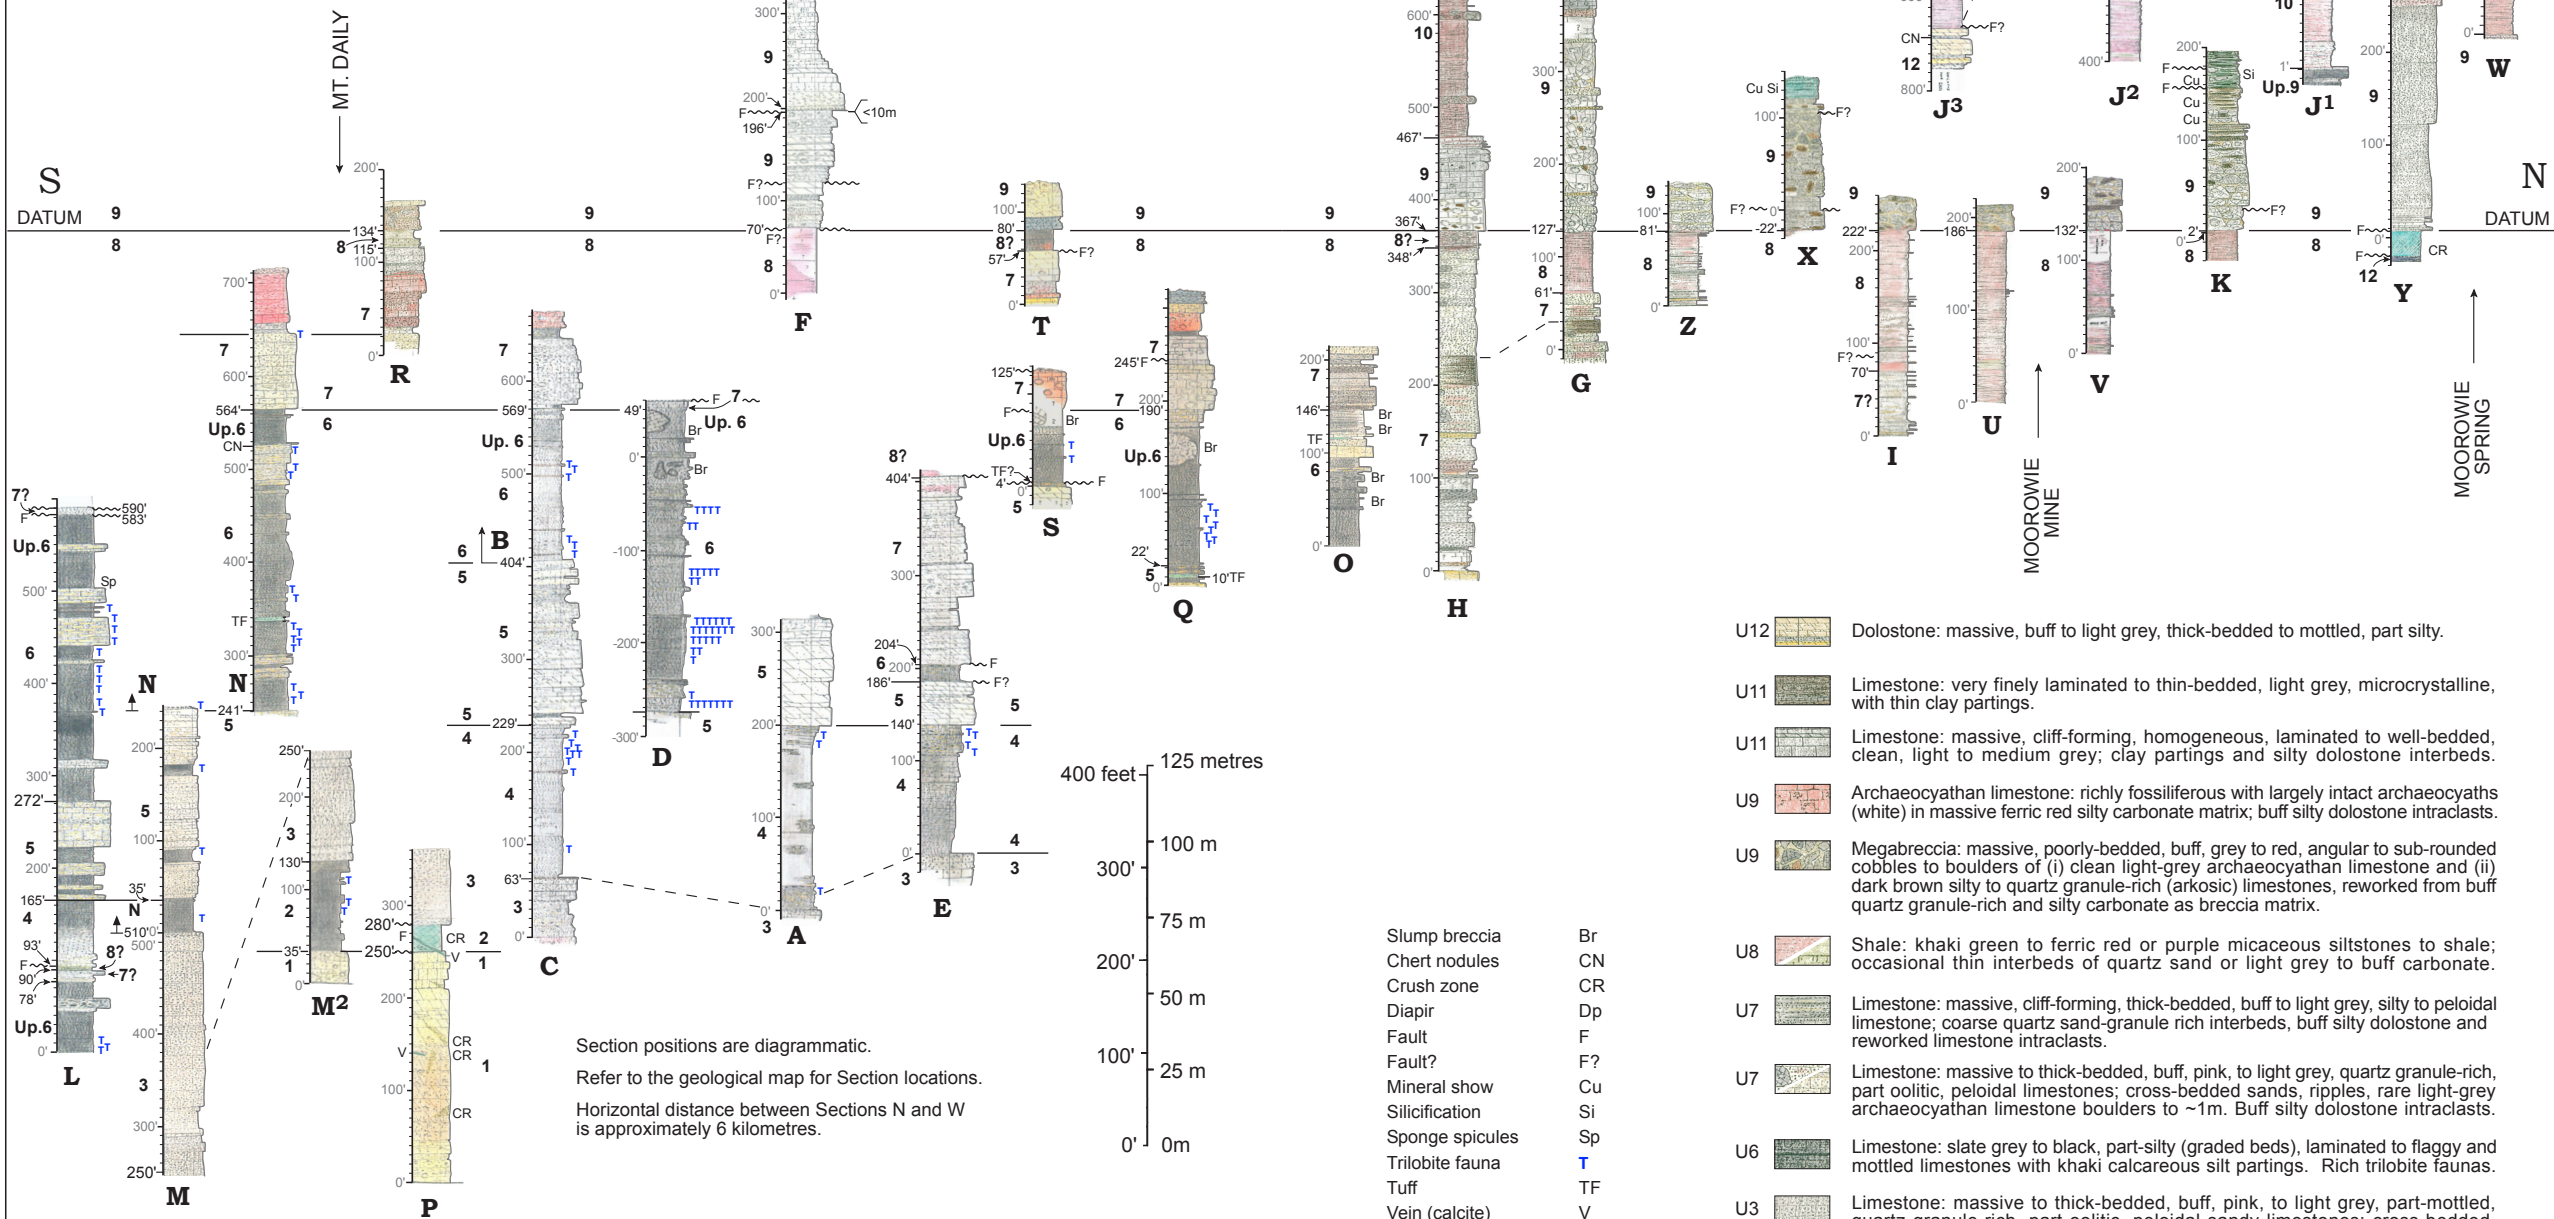

Supplement: Supplementary file 1 [file 2 › taje_a_1586771_sm7102.pdf]

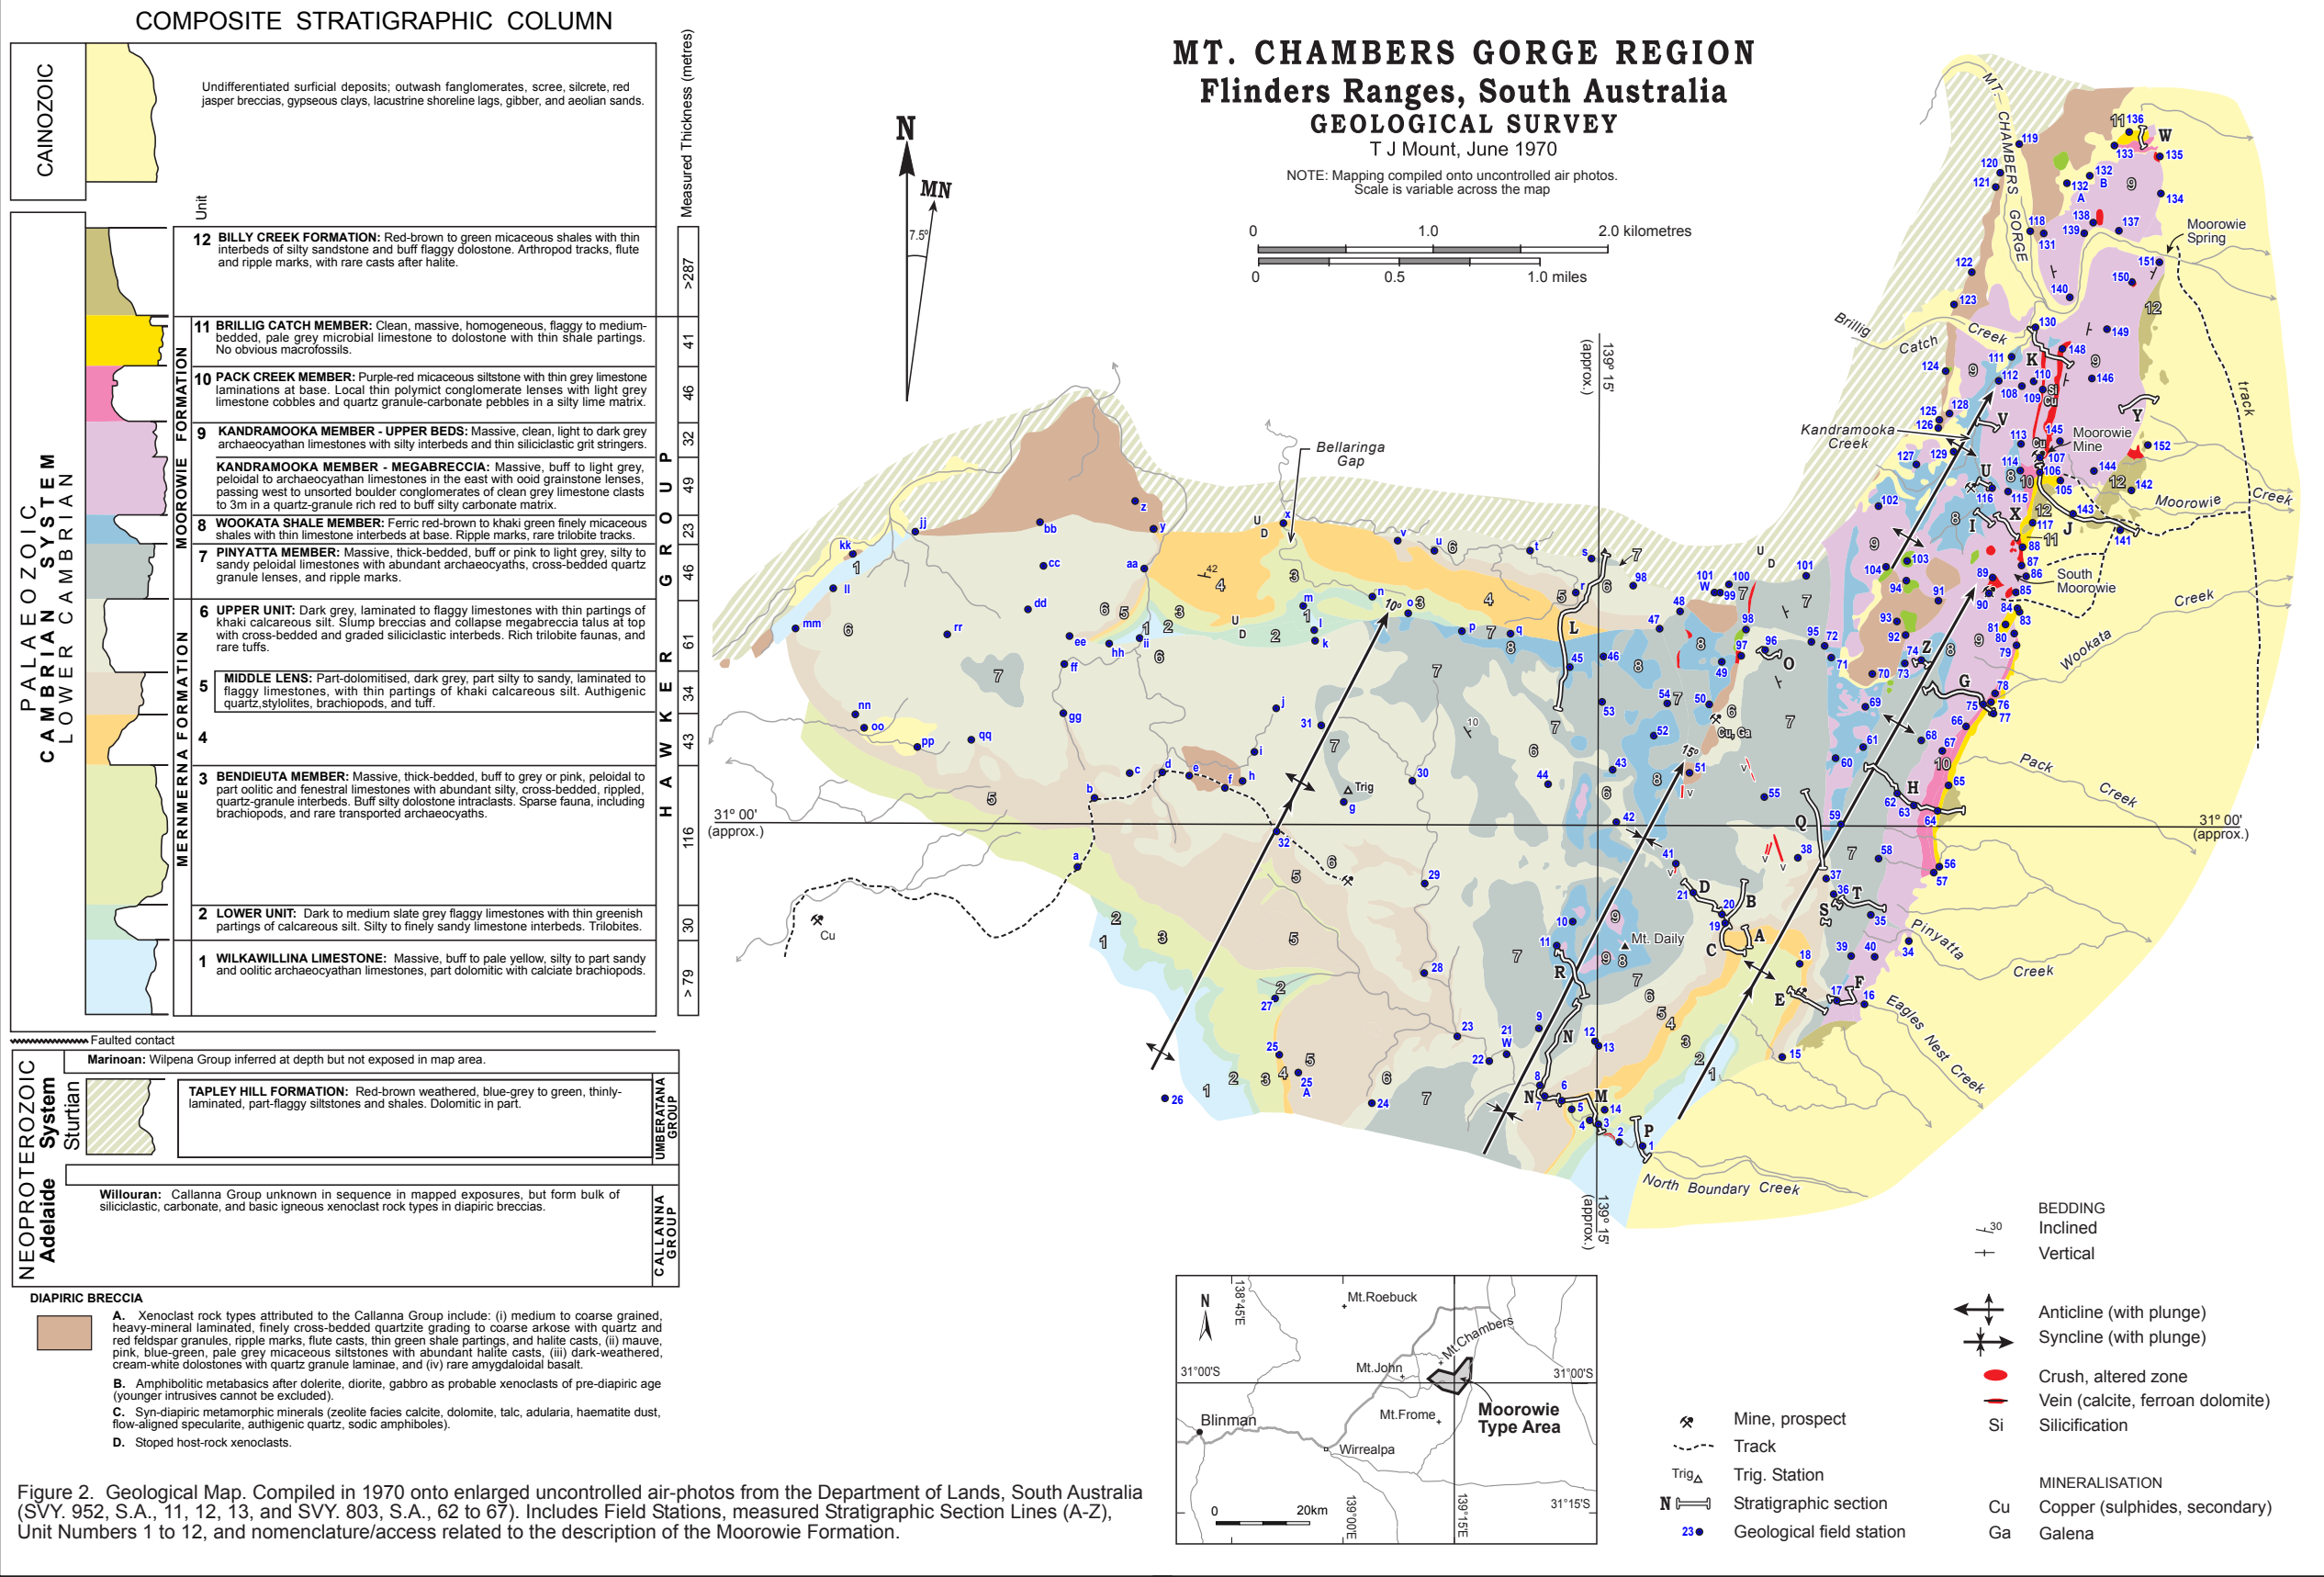

Supplement: Supplementary file 1 [file 2 › taje_a_1586771_sm7091.pdf]

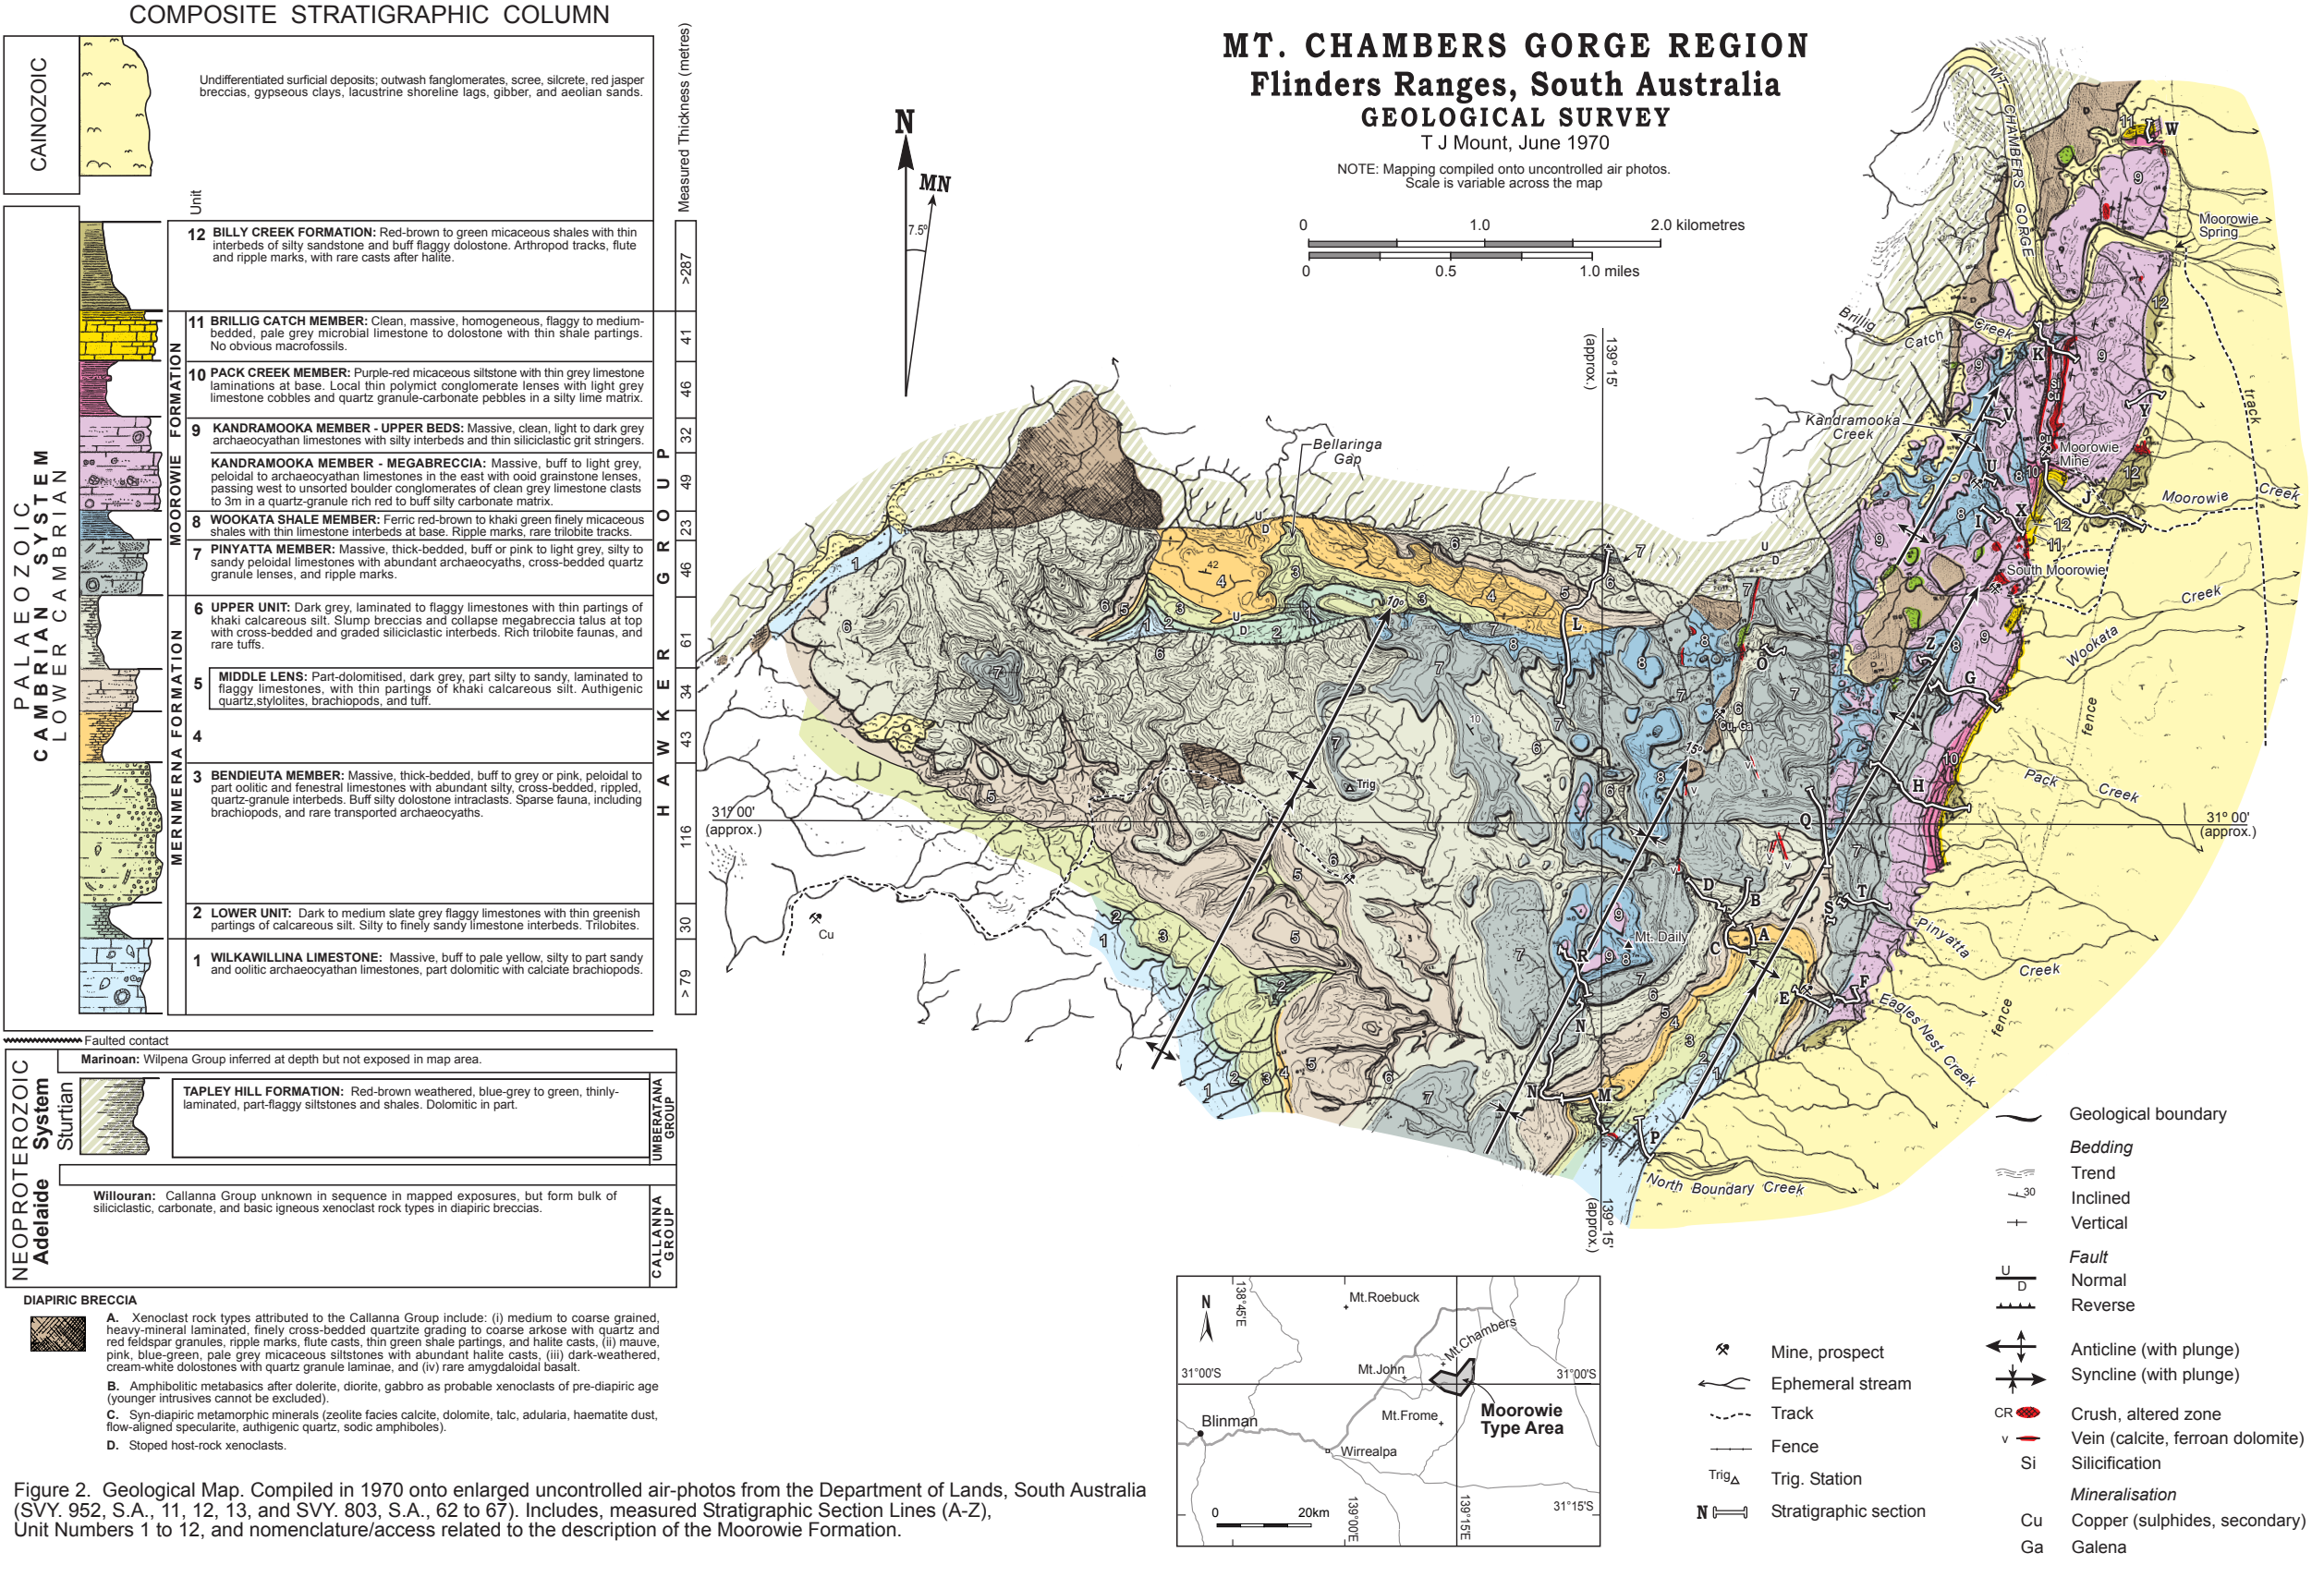

Supplement: Supplementary file 1 [file 2 › taje_a_1586771_sm7090.pdf]
